# Supplementary material
Source: publisher site journal article supplement (https://www.dovepress.com/article/288283)
Supplement: Supplementary file 1 [file get_supplementary_file.php]

SUPPLEMENTARY MATERIAL

**Efficacy of rFVIIIFc versus Emicizumab for the Treatment of Patients with Hemophilia A without Inhibitors: Matching-Adjusted Indirect Comparison of A‑LONG and HAVEN Trials**

Robert Klamroth1

Piotr Wojciechowski2

Samuel Aballéa3

Françoise Diamand4

Zalmai Hakimi5

Jameel Nazir5

Lydia Abad-Franch6

Stefan Lethagen7

Elena Santagostino8

Michael D. Tarantino9

1Department of Internal Medicine, Hemophilia Treatment Centre, Vivantes Klinikum im Friedrichshain, Berlin, Germany; 2Creativ-Ceutical, Krakow, Poland; 3Creativ-Ceutical, Rotterdam, the Netherlands; 4Creativ-Ceutical, Paris, France; 5Health Economics and Outcomes Research (Global), Sobi, Stockholm, Sweden; 6Global Medical Affairs Hematology, Sobi, Stockholm, Sweden; 7Medical and Clinical Sciences, Sobi, Stockholm, Sweden; 8Medical Affairs Hematology, Sobi, Stockholm, Sweden; 9The Bleeding and Clotting Disorders Institute, University of Illinois College of Medicine-Peoria, Peoria, IL, USA

**Supplementary Table 1.** Assessment of balance in patient characteristics and effective sample size (Comparator 1: emicizumab Q1W [HAVEN-3])

|  | **Before matching** | | **rFVIIIFc adjusted population** | |
| --- | --- | --- | --- | --- |
|  | **Emicizumab (n=99)** | **rFVIIIFc unadjusted population (n=117)** | **Estimate (SD)** | **ESS, n (%)** |
| Age, mean (SD) | 37.6 (14.3) | 32.9 (12.9) | 37.6 (13.7) | 102 (88) |
| Number of target joints, mean (SD) | 1.4 (1.6) | 1.7 (2.1) | 1.4 (1.6) | 114 (97) |
| Proportion with prior prophylaxis, % | 63.6 | 73.5 | 63.6 | 111 (95) |
| †Ethnicity, % | 71.7 | 67.5 | 71.7 | 116 (99) |
| Treatment duration, weeks (SD) | 32.8 | 32.6 (8.1) | 32.8 | 117 (100) |
| Age, mean (SD)  Number of target joints, mean (SD)  Proportion with prior prophylaxis, %  †Ethnicity, %  Treatment duration, weeks |  |  | 37.6 (13.9)  1.4 (1.6)  63.6  71.7  32.8 | 94 (80) |

**Notes:** †Proportion of white patients

**Abbreviations:** ESS, effective sample size; MAIC, matching-adjusted indirect comparisons; Q1W, once a week; Q2W, once every two weeks; Q4W, once every four weeks; SD, standard deviation.

**Supplementary Table 2.** Assessment of balance in patient characteristics and effective sample size (Comparator 2: emicizumab Q2W [HAVEN-3])

|  | **Before matching** | | **rFVIIIFc adjusted population** | |
| --- | --- | --- | --- | --- |
|  | **Emicizumab (n=35)** | **rFVIIIFc unadjusted population (n=117)** | **Estimate (SD)** | **ESS, n (%)** |
| Age, mean (SD) | 40.4 (11.4) | 32.9 (12.9) | 40.4 (13.9) | 85 (73) |
| Number of target joints, mean (SD) | 2.2 (1.7) | 1.7 (2.1) | 2.2 (1.7) | 91 (78) |
| Proportion with prior prophylaxis, % | 0.0 | 73.5 | 0.0 | 31 (26) |
| †Ethnicity, % | 57.1 | 67.5 | 57.1 | 112 (95) |
| Treatment duration, weeks (SD) | 33.1 | 32.6 (8.2) | 33.1 | 117 (100) |
| Age, mean (SD)  Number of target joints, mean (SD)  Proportion with prior prophylaxis, %  †Ethnicity, %  Treatment duration, weeks |  |  | 40.4 (12.2)  2.2 (1.7)  0.0  57.1  33.1 | 19 (16) |

**Notes:** †Proportion of white patients

**Abbreviations:** ESS, effective sample size; MAIC, matching-adjusted indirect comparisons; Q1W, once a week; Q2W, once every two weeks; Q4W, once every four weeks; SD, standard deviation.

**Supplementary Table 3.** Assessment of balance in patient characteristics and effective sample size (Comparator 3: emicizumab Q4W [HAVEN-4])

|  | **Before matching** | | **rFVIIIFc adjusted population** | |
| --- | --- | --- | --- | --- |
|  | **Emicizumab (n=41)** | **rFVIIIFc unadjusted population (n=117)** | **Estimate (SD)** | **ESS, n (%)** |
| Age, mean (SD) | 38.7 (15.7) | 32.9 (12.9) | 38.7 (15.7) | 83 (71.3) |
| Proportion with 1 target joint, % | 19.5 | 22.2 | 19.5 | 116 (99.6) |
| Proportion with ≥2 target joint, % | 41.5 | 39.3 | 41.5 |
| Proportion with prior prophylaxis, % | 73.2 | 73.5 | 73.2 | 117 (100) |
| †Ethnicity, % | 75.6 | 67.5 | 75.6 | 114 (97.1) |
| Treatment duration, weeks (SD) | 26.2‡ | 32.6 (8.2) | 26.2‡ (10.4) | 50 (42.5) |
| Age, mean (SD)  Proportion with 1 target joint, %  Proportion with ≥2 target joint, %  Proportion with prior prophylaxis, %  †Ethnicity, %  Treatment duration, weeks (SD) |  |  | 38.7 (15.7)  19.5  41.5  73.2  75.6  26.2‡ | 36 (30.4) |

**Notes:** †Percentage of white patients; ‡Estimated mean = (minimum value + maximum value + 2) / 4

**Abbreviations:** ESS, effective sample size; MAIC, matching-adjusted indirect comparisons; Q1W, once a week; Q2W, once every two weeks; Q4W, once every four weeks; SD, standard deviation.

**Supplementary Table 4.** Summary of safety data for rFVIIIFc from the individualized prophylaxis arm of A-LONG and for emicizumab from
all prophylaxis arms of HAVEN 3 and HAVEN 4

|  | | **rFVIIIFc** | **Emicizumab** | | | |
| --- | --- | --- | --- | --- | --- | --- |
| **A-LONG** | **HAVEN 3** | | | **HAVEN 4** |
| **Individualized prophylaxis** | **Q1W (Group A)** | **Q1W (Group D)** | **Q2W (Group B)** | **Q4W** |
| Total number of patients, n | | 117 | 36 | 63 | 35 | 41 |
| Median exposure, weeks | | 32.1 | 29.3 | 33.1 | 30.1 | 25.6 |
| Any AE, total number of events (mean number per patient) | | 219 (1.9) | 143 (4.0) | 236 (3.7) | 145 (4.1) | 148 (3.6) |
| SAEs |  | |  |  |  |  |
| Total number of patients with ≥1 SAE  Total number of events | | 10  NR | NR  1 | NR  10 | NR  3 | 1  1 |
| AEs, n (%) |  | |  |  |  |  |
| Nasopharyngitis | | 16 (13.7) | 2 (5.6) | 10 (15.9) | 6 (17.1) | 11 (26.8) |
| Injection site reaction | | 0 | 9 (25.0) | 20 (31.7) | 7 (20.0) | 9 (22.0) |
| Arthralgia | | 10 (8.5) | 7 (19.4) | 14 (22.2) | 6 (17.1) | 8 (19.5) |
| Headache | | 5 (4.3) | 3 (8.3) | 8 (12.7) | 4 (11.4) | 5 (12.2) |
| Influenza | | 5 (4.3) | 1 (2.8) | 5 (7.9) | 3 (8.6) | NR |
| Upper respiratory tract infection | | 6 (5.1) | 4 (11.1) | 8 (12.7) | 4 (11.4) | 3 (7.3) |

**Abbreviations:** AE, adverse event; Q1W, once a week; Q2W, once every two weeks; Q4W, once every four weeks; NR, not reported;
SAE, serious adverse event.
